# Supplementary material for: Novosorb® BTM- history, production and application in challenging wounds
Source: Front Bioeng Biotechnol. 2024 Nov 13;12:1450973. doi: 10.3389/fbioe.2024.1450973 (PMC11615573; doi:10.3389/fbioe.2024.1450973)
Supplement: Supplementary file 1 [file Table1.XLSX]

## Sheet: Supplementary Table
Ref	Author	Country	Year	N	Age (range or mean/sd)	Aetiology	Anatomical Area	Average Size (cm^2 or %TBSA)	Challenging Characteristic	Adjuvant Therapy	Complication	Salvage	Short Term Outcome	Follow Up	Follow Up Outcome
17	Abla et al	USA	2022	3	18-42	Burns: Primary	Anterior, posterior torso, bilateral extremities	53.5% TBSA	Extensive Burns	CEA	haematoma; haemorrhage	vasopressor support; BTM Reapplication	Complete Graft Take	NM	NA
18	Betar et al	Australia	2023	22	30-48	Burns: Primary	NM	49% TBSA	Extensive Burns	NM	Partial BTM loss	BTM Reapplication	Similar Outcome to Allograft at Reduced Cost and Time	NM	NA
19	Concannon et al	Australia	2021	1	77	Burns: Primary	Bilateral Thighs, buttocks, perineal, genital, lower to mid trunk, upper limbs	42% TBSA	Extensive Burns; Challenging Anatomical Area (Scrotum)	NM	Colonisation of wound bed	Local Evacuation	98% BTM + Skin Graft Take	6 months	Stable wound reconstruction; no perineal/axillary scar; normal genitourinary function
20	Greenwood et al	Australia	2020	1	34	Burns: Primary	Entire body surface area	95% TBSA	Extensive Burns	Acticoat; Biobrane; CEA Spray	Partial BTM Loss	BTM Application to Bone	Acceptable BTM + Skin Graft Take	12 months	Stable reconstruction; Small axillary contracture
21	Greenwood et al	Australia	2018	5	21-49	Burn: Primary	Upper and lower limbs, anterior + posterior trunk	48% TBSA	Extensive Burns; Colonised Wound; Exposed Structures	Mepitel; Acticoat	Faecal contamination of BTM; Olecranon ulcers; Infected BTM; haematomas; Infected BTM	BTM Reapplication	94% BTM + Skin Graft Take	5.6- 17 months	Stable reconstruction; Pliable scar; Good mobility over joints and gliding of tendons
22	Greenwood et al	Australia	2016	1	66	Burns: Primary	Calvarium	7% TBSA	Exposed Structures; Challenging Anatomical Area	Acticoat	Nil	NA	100% BTM + Skin Graft take	NM	NA
23	Heard et al	USA	2023	10	24.1 (9.5)	Burns: Primary	Various	80.8% TBSA	Extensive Burns	CEA Spray; Xeroform dressing	axillary contractures; neck contractures; elbow contractures; Partial BTM Loss	Z plasty; STSG; BTM Reapplication	95% BTM + Skin Graft Take	NM	NA
24	Kelly et al	Canada	2021	1	8	Burns: Primary	Back, Buttock, Abdomen, Chest, Neck	86% TBSA	Extensive Burns	CEA Sheet	Nil	NA	99.5% BTM + CEA Take	10 months	Stable wound reconstruction; Pliable Scar; Good Contour; No Pruritis
25	Larson et al	USA	2019	3	21-53	Burns: Primary	Upper Limbs, Lower Limbs, Torso	51.67% TBSA	Extensive Burns	CEA spray; Telfa; Xeroform	Infection	Debridement and BTM Reapplication	Acceptable BTM + Skin Graft + CEA Take	NM	NA
26	Lo et al	Australia	2022	30	18-70	Burns: Primary	Upper Limbs, Lower Limbs, Chest, Abdomen, Back	47.5% TBSA	Extensive Burns	NM	Nil	NA	81.9% BTM + Skin Graft Take	12 months	Stable wound reconstruction; Pliable Scar
27	Schmitt et al.	Australia	2021	20	17-94	Burns: Primary	Upper and Lower Limbs	44.5% TBSA	Extensive Burns	NM	NM	NA	Acceptable BTM + Skin Graft + CEA Take	12 months	Stable wound reconstruction; Pliable Scar
28	Tan et al	UK	2022	1	36	Burns: Primary	Back, Arm, Neck, Torso	30% TBSA	Poor Nutritional Status of Patient	VAC Dressing; NG feeds	Nil	NA	100% BTM + Skin Graft take	2 months	Some erythema over scar; no contracture
29	Tapking et al	Germany	2024	175	56.2	Burns: Primary	Various	30.3% TBSA	Extensive burns; Peripheral Vascular Disease	VAC Dressing; Mepilex	Infection;Haematoma; Various	Local Evacuation; Rarely requiring reapplication	82% BTM Take; 87.3% STSG take	NM	NA
30	Telianidis et al.	Australia	2020	1	32	Burns: Primary	Torso, Left Upper Limb	36% TBSA	Extensive Burns	Acticoat; Hypafix	Infected Fluid Collection under STSG	Pseudomonas infection requiring re-grafting.	Acceptable BTM Take	10 months	Stable wound reconstruction; breast architecture preserved
31	Gładysz et al	Germany	2022	1	69	Burns: Secondary	Bilateral Lower Limbs	15% TBSA	Colonised Wound Bed; Exposed Structures	Versajet; Sulfamylon; IR light application	Colonisation of wound bed	Local Evacuation	100% BTM + Skin Graft take	NM	NA
32	Shah et al.	UK	2022	1	20	Cancer: Skin	Abdomen	140 cm^2	N/A	Hypafix	Nil	NA	100% BTM + Skin Graft take	3.5 months	Stable wound reconstruction; Resistance to radiotherapy
33	Buick et al	UK	2024	1	70	Cancer: Skin	Right eyebrow, forehead, temple, orbit, zygoma	156 cm^2	Post Operative Radiotherapy; Exposed Structures	Nil	Cellulitis	PO Abx; Local Evaculation	100% BTM + Skin Graft take	10 months	Stable wound reconstruction; Resistance to radiotherapy
34	Sun et al	New Zealand	2021	1	82	Cancer: Skin	Left Preauricular area	95 cm^2	Post Operative Radiotherapy; Exposed Structures	Nil	Nil	NA	100% BTM + Skin Graft take	6 months	Stable wound reconstruction; Resistance to radiotherapy
35	Sun et al.	New Zealand	2021	1	74	Cancer: Skin	Back, Elbow	900 cm^2	Post Operative Radiotherapy; Exposed Structures	NM	Nil	NA	100% BTM + Skin Graft take	4 months	Stable wound reconstruction; No contracture
36	Kuang et al	Australia	2022	18	31-86	Chronic Wounds Arterial Ulcer, Diabetic Ulcer	Feet and Legs	NM	Infection; Exposed Strucutres; Peripheral Vascular Disease	Acticoat; Aquacel; VAC Dressing	Osteomyelitis; Delayed Wound healing	BKA; Secondary Intention Healing	100% BTM + Skin Graft take	3-18 months	15.4% of patients had wound breakdown; otherwise stable wound reconstruction
37	Guerriero et al	Australia	2023	22	67.3 (10.1)	Chronic Wounds: Arterial Ulcer	Feet and Legs	NM	Chronic Wound; Exposed Structures; Peripheral Vascular Disease	VAC Dressing; Granufoam; Mircodacyn	Chronic Wounds	Minor and Major Amputation	65.3% BTM + Skin Graft Take	12 months	13% of patients required subsequent amputation; otherwise all other wounds remained stable
38	Meagher et al	Ireland	2024	22	65.2 (16.1)	Chronic Wounds: Arterial Ulcer, Amputation Stump	Bilateral Legs, Feet, Chest	NM	Chronic Wound; Exposed Structures; Peripheral Vascular Disease	NM	Incomplete Healing	Amputation	63% BTM + Skin Graft Take	NM	NA
39	Semple et al.	Australia	2022	1	66	Chronic Wounds: Vasculitis Ulcer	Bilateral Upper Limbs, Left Lower Limb	12.5% TBSA	Infection; Exposed Structures; Peripheral Vascular Disease; Immunosuppression	Acticoat; Hypafix	Infection; Not Feasible to Graft	IV Abx; Local Evacuation	Acceptable BTM take + Spontaneous Re-Epithelialisation	6 months	All open wounds healed by secondary intention; grafted wounds demonstrated stable reconstruction
40	Chia et al	Australia	2024	1	48	Infection: Fornier Gangrene	Mons pubis, bilateral scrotum, penis and superior aspect of perineum	NM	Infection; Challenging Anatomical Area (External Genital Area)	VAC Dressing; Diverting Colostomy	Traumatic Hypospadias	Urology Reconstruction	100% BTM + Skin Graft take + urination and erection restored	3 months	Stable wound reconstruction; good cosmetic effect
41	Jennings et al	Australia	2021	1	17	Infection: Gram Negative Sepsis	Right Lateral Leg	19% TBSA	Infection; Exposed Structures	Nanocrystalline silver dressing	Pseudomonal aureginosa colonisation	Local Evacuation; Antibacterial dressing	95% BTM + Skin Graft Take	5.6 months	Stable wound reconstruction; Pliable Scar
42	AlNafisee et al	Ireland	2022	1	60	Infection: Necrotising Fasciitis	Circumferential Thigh	2800 cm^2	Infection; Extensive Wound	Acticoat Flex 7 dressing; VAC Dressing	Cellulitis	IV Abx	80% BTM + Skin Graft Take	5 months	Stable wound reconstruction; Pliable Scar
43	Austin et al	USA	2023	2	63,38	Infection: Necrotising Fasciitis	Right torso, right upper extremity, left chest, left upper extremity, bilateral axilla and neck	22.5% TBSA	Infection; Exposed Structures; Extensive Wound	VAC Dressing; CEA Spray; silver dressing	STSG non-take	Regrafting	98% BTM + Skin Graft Take, Small area of exposed bone	11 months	Exposed Rib; All other wound cover appropriate
44	Barker et al	Australia	2022	3	32-56	Infection: Necrotising Fasciitis	Torso, Left Face and Neck, Right Abdomen, Flank, Thigh, Leg, Foot	NM	Infection: Exposed Structures; Challenging Anatomical Area (Neck, Groin, Axila)	nil	Nil	NA	100% BTM + Skin Graft take	2-12 months	Stable wound reconstruction; Good Joint Mobility
45	Sreedharan et al.	Australia	2019	1	42	Infection: Necrotising Fasciitis	Anterior abdomen, Right lower limb, right arm	32% TBSA	Infection; Exposed Structures	Acticoat; Hyperbaric O2 Therapy	Nil	NA	100% BTM + Skin Graft take	20 months	Stable wound reconstruction; Retun of ankle mobility; return of function
46	Wagstaff et al.	Australia	2019	7	32-76	Infection: Necrotising Fasciitis	Chest, Lower Limbs, Neck	8.57% TBSA	Infection; Exposed Structures; Peripheral Vascular Disease; Poor Nutritional Status	Acticoat; Hypafix; VAC Dressing	Partial BTM loss	Secondary Intention Healing	Acceptable BTM + Skin Graft Take	1-20 months	Stable wound reconstruction; Pliable Scar; Good Contour
47	Frost et al	UK	2022	1	28	Misc: Dextrose Extravasation	Right Foot	1.5% TBSA	Exposed Structures	Mepilaex Ag	Nil	NA	100% BTM + Skin Graft take	4 months	Stable wound reconstruction; Pliable Scar
48	Malkoc et al.	USA	2022	1	50	Misc: Hidradinitis Suppurativa	Perianal and Gluteal	400 cm^2	Infection; Peripheral Vascular Disease	VAC Dressing	Nil	NA	100% BTM + Skin Graft take	6 months	Stable wound reconstruction
49	Cheng et al	USA	2021	2	36,33	Misc: IVDU	Bilateral Upper Extremities	85.55 cm^2	Infection	VAC dressing	Nil	NA	Acceptable BTM + Skin Graft Take	4-22 months	Stable wound reconstruction
50	Wagstaff et al.	Australia	2015	10	46-76	NM	Extremities	NM	Infection; Exposed Structures; Peripheral Vascular Disease	Acticoat; Hypafix; VAC Dressing	Serous Fluid Collection; Infected Fluid Collection	Local Evacuation	75% BTM Take + 100% Skin Graft Take	NM	NA
51	Carrington-Windo et al	UK	2021	1	23	Trauma	Forehaead, Chest, Right Forearm, Bilateral knees, Left Ankle	10% TBSA	Colonised Wound Bed; Exposed Structures; Challenging Anatomical Area (Chest)	VAC Dressing	Nil	NA	100% BTM + Skin Graft take	3.8 months	Stable wound reconstruction; shoulder and scapular ROM unaffected
52	Crowley et al	Australia	2020	1	9	Trauma	Groin, Bilateral thighs, abdomen, penis	25% TBSA	Exposed Fracture; Extensive Injury	Mepilex Ag; Hypafix; VAC Dressing	Soiling of wound bed	Local Evacuation	100% BTM + Skin Graft take	NM	NA
53	Damkat-Thomas et al	Australia	2019	1	72	Trauma	Left Foot	NM	Exposed Structures	Nil	Small area of SSG loss	Regrafting	Acceptable BTM + Skin Graft Take	16 months	Stable wound reconstruction; Pliable Scar; Good extensor tendon gliding
54	Jou et al	USA	2024	2	40,43	Trauma	Bilateral Upper Extremities	NM	Exposed Structures; Tendon Repair	Splint	Nil	NA	100% BTM + Skin Graft take	5.7 months	Stable wound reconstruction; Pliable Scar; Good extensor tendon gliding
55	Knightly et al	Ireland	2023	1	15	Trauma	Upper Limb	NM	Exposed Structures	Acticoat	Nil	NA	100% BTM + Skin Graft take	12 months	Stable wound reconstruction
56	Najem et al.	Germany	2024	7	2.0-11	Trauma	Upper and Lower Limb	180 cm^2	Exposed structures, Colonisation of wound-bed	VAC Dressing	Nil	NA	100% BTM + Skin Graft take	6-28 months	Stable wound reconstruction; one patient with contracture that did not limit ROM
57	Patel et al.	USA	2022	1	3	Trauma	Head and Face	400 cm^2	Infection; Exposed Structures; Challenging anatomical area (skull)	VAC Dressing	Nil	NA	100% BTM + Skin Graft take	6 months	Stable wound reconstruction; Pliable Scar
58	Saha et al.	India	2021	1	54	Trauma	Forehead	65 cm^2	Exposed structures	Platelet rich plasma injections	Nil	NA	100% BTM + Skin Graft take	6 months	Stable wound reconstruction; Pliable Scar
59	Saha et al.	India	2022	1	64	Trauma	Right Upper Limb	270 cm^2	Exposed structures; Peripheral Vascular Disease	Platelet rich plasma injections; VAC Dressing	Nil	NA	100% BTM + Skin Graft take	6 months	Stable wound reconstruction; Pliable Scar; hand function unaffected
60	Wu-Fienberg et al.	USA	2021	6	35-60	Trauma	Upper Limbs	97 cm^2	Exposed structures	VAC Dressing	Nil	NA	100% BTM + Skin Graft take	6-12 months	Stable wound reconstruction
61	Wu et al.	USA	2022	5	66	Various: Pimary Burn, Trauma, surgical wound, tumour excision	Head and Neck	213 cm^2	Infection; Peripheral Vascular Disease	NM	Infected Fluid Collection	Local Evacuation	100% BTM + Skin Graft take; Superior result to CCS	6.8- 8.4 months	Stable wound reconstruction; Pliable Scar; superior result to CCS
62	Li et al	Australia	2021	27	47-95	Various: Pressure Ulcer, osteomyelitis, necrotising fasciitis, cancer, non healing wound	Lower Limb, Upper Limb, Head and Neck, Abdominal, and Breast	NM	Infection; Exposed Structures; Irradiated Wound Bed	Acticoat; VAC Dressing; Splint in wounds over joints	Sinus tract in abdominal wound; partial wound breakdown with exposed bone; failed initial skin graft; failed integration; graft failure; fall with haematoma	Transposition Flap; Secondary Intention Healing	Variable BTM + Skin Graft Take	3 to 18 months	Stable wound reconstruction in those that initially took
63	Wu et al.	USA	2022	31	18-68	Various: Primary Burns, Trauma, pressure ulcer, osteomyelitis, compartment syndrome	Upper Limbs	133 cm^2	Infection; Peripheral Vascular Disease	VAC Dressing	Infections; Non-Take; Haematoma	Local Evacuation; BTM Reapplication	Acceptable BTM + Skin Graft Take; Similar result to CCS	4.9 months	Secondary healing in a majority of wounds that did not take
64	Lo et al	Australia	2023	55	26-80	Various: Primary Burns, Nectrotising Fasciitis , Secondary Burns	Head and Neck, Upper and Lower Limbs, Trunk	25.2% TBSA	Extensive Burns; Exposed Structures	Not specified	Nil	N/A	NM	18.5-84.9 months	Stable wound reconstruction; Scar good cosmesis
65	Tapking et al.	Germany	2024	300	54.2 (20.1)	Various: Primary Burns, Trauma, Infections, Cancer Reconstruction	Trunk, Upper Limbs, Lower Limbs	14.1% TBSA	Exposed structures; Infection; Peripheral Vascular Disease	Mepilex® Ag	Haematomas; Infection	Local Evacuation; Topical Antiseptic; Abx	82.7% BTM + Skin Graft Take	NM	NA
66	Schlottmann et al.	Germany	2022	20	15-82	Various: Primary Burns, Trauma, Necrotising Fasciitis, Vascular/Diabetic Ulcers, Others	Lower Limbs, Upper Limbs, Trunk, Head, Groin	NM	Infection; Exposed Structures	VAC Dressing; Phage therapy	BTM Non Take	Free Flap Reconstruction	75% BTM + Skin Graft Take	6 months	NM
67	Storey et al.	Australia	2023	63	1wk - 16 years	Various: Trauma, Burns, Scar reconstruction, Ulcers, Cancer	Trunk, Upper Limb, Lower Limb, Head	3% TBSA	Exposed structures; Infection	Acticoat; VAC Dressing	Infection; STSG Loss	Regrafting	Variable BTM + Skin Graft Take	NM	NA
68	Kidd et al	UK	2023	37	14-93	Various: Trauma, Chronic Wound, Infection, Cancer Reconstruction	Upper Limbs, Lower Limbs, Torso, Groin	1% TBSA	Exposed Structures	NM	BTM Non Take; Infection; Haematoma	Local Evacuation; Regrafting	70.3% BTM + Skin Graft Take	0.6-32 months	NM
69	Concannon et al	Australia	2023	55	17-94	Various: Trauma, Primary Burns, Necrotising Fasciitis, Ischaemic Injury, Cancer reconstruction	Lower limb, Upper limb, Scalp, Trunk, Neck	NM	Exposed Structures; Infection	VAC Dressing	BTM Loss; Chronic Wound; Infection; Tendon Adhesions	Free Flap Reconstruction; Regrafting: Local Evacuation; Tenolysis	>50% of non graftable wounds were able to be grafted without complication. Many of those that experienced complications could be regrafted successfully	3-72 months	Stable wound reconstruction; Good Joint Mobility
70	Solanki et al.	New Zealand	2020	25	15-86	Various: Trauma, Primary Burns, Secondary Burns Reconstruction, Necrotising Fasciitis, Cancer Reconstruction	Lower Limb, Upper Limb, Trunk	NM	Exposed Structure; Infection	Acticoat; Hypafix; VAC Dressing	BTM Non Take	Regrafting; Quilting BTM to Wound	Acceptable BTM + Skin Graft Take	1-7 months	NM

## Sheet: Abbreviations
Abbreviation	Long Form
sd	Standard Deviation
TBSA	Total Body Surface Area
NM	Not Mentioned
CEA	Cultured Epithelial Autograft
VAC	Vacuum Assisted Closure
STSG	Split Thickness Skin Graft
BKA	Below Knee Amputation
Abx	Antibiotics
NA	Not applicable
IVDU	Intravenous Drug Use
